# Supplementary material for: The functional diversity of phytoplankton depends on the type of ecosystem and the seasonal period in areas affected by residues from the biggest Brazilian mining disaster
Source: Research Square preprint supplement (doi:10.21203/rs.3.rs-6298271/v1), 2025-04-03
Supplement: Supplementary file 1 [file 6ea767babc69145299aaecf5.docx]

**The functional diversity of phytoplankton depends on the type of ecosystem and the seasonal period in areas affected by residues from the biggest Brazilian mining disaster**

**Aquatic Sciences**

**Authors and Affiliations**

Fabrício Bronzoni-Oliveira1* - [fabriciobronzoni@gmail.com](mailto:fabriciobronzoni@gmail.com) - <https://orcid.org/0000-0003-1801-4753>

Luciane Oliveira Crossetti2 - [luciane.crossetti@ufrgs.br](mailto:luciane.crossetti@ufrgs.br) - <https://orcid.org/0000-0002-0049-4229>

Eneida Maria Eskinazi Sant Anna3 - [eskinazi@ufop.edu.br](mailto:eskinazi@ufop.edu.br) - <https://orcid.org/0000-0001-6409-7129>

Leidiane Pereira Diniz3 - [leidiane.diniz@ufop.edu.br](mailto:leidiane.diniz@ufop.edu.br) - <https://orcid.org/0000-0002-7516-6879>

Gilberto Fonseca Barroso1 - [gilberto.barroso@ufes.br](mailto:gilberto.barroso@ufes.br) - <https://orcid.org/0000-0002-4886-4890>

Alessandra Delazari-Barroso4 - [alessandra.delazari@faesa.br](mailto:alessandra.delazari@faesa.br) - <https://orcid.org/0009-0002-8593-3741>

Valéria de Oliveira Fernandes1 - [valeriaufes@yahoo.com.br](mailto:valeriaufes@yahoo.com.br) - <https://orcid.org/0000-0002-1968-3927>

Stéfano Zorzal-Almeida1 - [stefano.almeida@ufes.br](mailto:stefano.almeida@ufes.br) - <https://orcid.org/0000-0002-9977-5898>

1. Universidade Federal do Espírito Santo (UFES), Vitória, CEP 29075-910, ES, Brazil.
2. Universidade Federal do Rio Grande do Sul (UFRGS), Porto Alegre, CEP 91540-000, RS, Brazil.
3. Universidade Federal de Ouro Preto (UFOP), Ouro Preto, CEP 35400-000, MG, Brazil.
4. Faculdades Integradas Espírito-santenses – FAESA Centro Universitário), Vitória, CEP 29053-360, ES, Brazil.

* Correspondence: [fabriciobronzoni@gmail.com](mailto:fabriciobronzoni@gmail.com)

**Keywords:** Functional traits, functional dispersion, functional dynamic, environmental impact, mining dam.

Table S1: Mean values and minimum and maximum (within parentheses) of the environmental variables for ecosystems and seasonal periods. Total sample size: Doce River: 94, Deep lakes: 70, Shallow lakes: 73.

| **Env.** | **Season** | **n** | **Turb (NTU)** | **TP (µg/L)** | **TN (µg/L)** | **dAl (µg/L)** | **tCr (µg/L)** | **dFe (µg/L)** | **tMn (µg/L)** |
| --- | --- | --- | --- | --- | --- | --- | --- | --- | --- |
| Doce river | Wet | 49 | 108.3  (9.6 - 369.8) | 170  (33.4 - 1302.5) | 3365  (2041.7 - 7665.7) | 116.9  (21 - 324.9) | 8.7  (1.2 - 19.3) | 282.5  (78.9 - 610.4) | 70.5  (16.2 - 199) |
| Dry | 45 | 8.1  (1.7 - 30.9) | 46.9  (27.6 - 80.9) | 3122.7  (2051.6 - 3883.7) | 32.8  (21 - 74) | 1.8  (1.1 - 6.8) | 142.8  (21 - 465.4) | 24.3  (4.6 - 49.3) |
| Deep Lakes | Wet | 36 | 4.4  (0 - 18.6) | 73.9  (21.2 - 400) | 1019.8  (419.1 - 2192.9) | 54.4  (21 - 343) | 2.4  (1.1 - 15.8) | 192.1  (32.1 - 447.7) | 27.5  (3.5 - 126.5) |
| Dry | 34 | 4  (0 - 20.8) | 37.3  (9.7 - 76.4) | 1066  (249.2 - 1840.8) | 29.2  (21 - 81.7) | 1.4  (1.1 - 4.2) | 128.7  (12.5 - 846.7) | 28  (3.7 - 109) |
| Shallow Lakes | Wet | 37 | 37.4  (3.6 - 174.6) | 156.5  (22.7 782.2) | 2876.9  (250.8 - 8193.9) | 50.7  (21 - 207.2) | 3.5  (1.1 - 12.5) | 559.5  (137.8 - 1092.2) | 181.1  (24.6 - 593.1) |
| Dry | 36 | 21  (5.5 - 49.6) | 48.4  (16.9 - 100.1) | 2437.5  (235.6 - 8749.4) | 30.6  (21 - 74.4) | 1.9  (1.1 - 5.2) | 322.2  (19.3 - 874.3) | 149.7  (18.2 - 539.3) |

Table S2: Mean values and minimum and maximum (in parentheses) of functional diversity among ecosystems and seasonal periods. FDis: functional dispersion, FEve: functional evenness, FDiv: functional divergence, FR: functional redundancy. Total sample size: Doce River: 94, deep lakes: 70, shallow lakes: 73.

| **Env.** | **Season** | **n** | **FDis** | **FEve** | **FDiv** | **FR** | **GP** |
| --- | --- | --- | --- | --- | --- | --- | --- |
| Doce river | Wet | 49 | 0.10  (0 - 0.23) | 0.44  (0.07 - 0.73) | 0.86  (0.46 - 1) | 0.48  (0.02 - 0.78) | 0.07  (0 – 1.02) |
| Dry | 45 | 0.15  (0 - 0.26) | 0.45  (0.04 - 0.82) | 0.87  (0.38 - 1) | 0.54  (0.04 - 0.83) | 0.04  (0 - 0.62) |
| Deep Lakes | Wet | 36 | 0.16  (0.02 - 0.23) | 0.39  (0.14 - 0.58) | 0.69  (0.34 - 0.99) | 0.66  (0.1 - 0.84) | 0.27  (0 - 1.65) |
| Dry | 34 | 0.13  (0.02 - 0.22) | 0.45  (0.21 - 0.75) | 0.74  (0.18 - 1) | 0.57  (0.05 - 0.83) | 0.41  (0.02 – 1.98) |
| Shallow Lakes | Wet | 37 | 0.09  (0.01 - 0.18) | 0.46  (0.03 - 0.91) | 0.76  (0.23 - 1) | 0.54  (0.01 – 0.8) | 0.33  (0 - 1.45) |
| Dry | 36 | 0.1  (0.01 - 0.21) | 0.43  (0.16 - 0.73) | 0.83  (0.38 – 0.99) | 0.56  (0.03 – 0.85) | 0.74  (0 - 10.91) |
